# Supplementary material for: Plasmon-enhanced photothermal properties of Au@Ti3C2Tx nanosheets for antibacterial applications
Source: Royal Society of Chemistry journal article supplement (doi:10.1039/d2nr05115j), 2022-01-01
Supplement: d2nr05115j1.pdf [file d2nr05115j1.pdf]

## Electronic Supplementary Information

# Plasmon-Enhanced Photothermal Properties of $\text{Au}@\text{Ti}_3\text{C}_2\text{T}_x$ Nanosheets for Antibacterial Applications

Shiqi Wen,<sup>a,b,1</sup> Youlin Xiong,<sup>a,1</sup> Shuangfei Cai,<sup>a,\*</sup> Haolin Li,<sup>a,b</sup> Xining Zhang,<sup>a,b</sup> Qian Sun,<sup>a</sup> Rong Yang<sup>a,b,\*</sup>

<sup>a</sup> CAS Key Lab for Biomedical Effects of Nanomaterials and Nanosafety, Center of Materials Science and Optoelectronics Engineering, CAS center for Excellence in Nanoscience, National Center for Nanoscience and Technology, University of Chinese Academy of Sciences, Beijing 100190, China

<sup>b</sup> Sino-Danish College, Sino-Danish Center for Education and Research, University of Chinese Academy of Sciences, Beijing 100190, China

<sup>1</sup> These authors contributed equally to this work.

\*Corresponding authors. E-mail addresses: caisf@nanoctr.cn, yangr@nanoctr.cn

## Contents

**Figure S1-S2.** Characterization of the  $\text{Ti}_3\text{C}_2\text{T}_x$  NSs

**Figure S3-S8.** Characterization of the  $\text{Au}_y@\text{Ti}_3\text{C}_2\text{T}_x$  nanocomposites

**Figure S9.** Mechanism study on the formation of the  $\text{Au}_y@\text{Ti}_3\text{C}_2\text{T}_x$  nanocomposites

**Figure S10-S11.** Photothermal properties of the  $\text{Au}_y@\text{Ti}_3\text{C}_2\text{T}_x$  nanocomposites

**Figure S12-S14.** Antibacterial study

**Table S1.** The composition of Au for the  $\text{Au}_y@\text{Ti}_3\text{C}_2\text{T}_x$  nanocomposites

**Appendix:** Details for the calculation of photothermal conversion efficiency

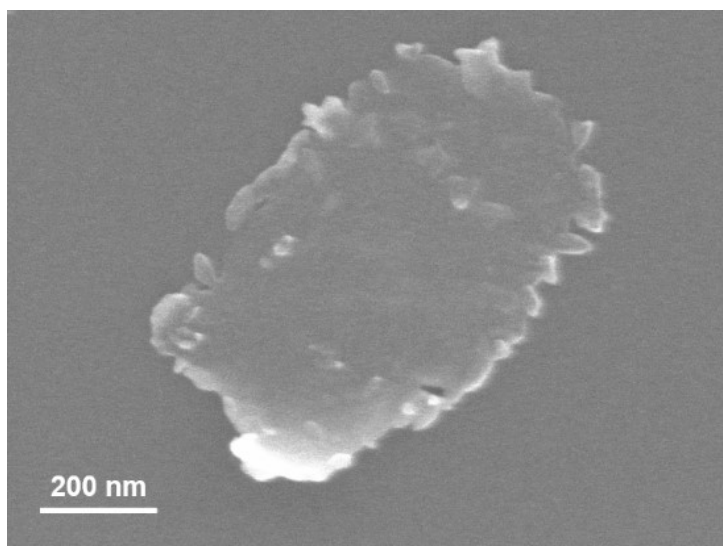

**Figure S1.** SEM image of the Ti<sub>3</sub>C<sub>2</sub>T<sub>x</sub> NSs.

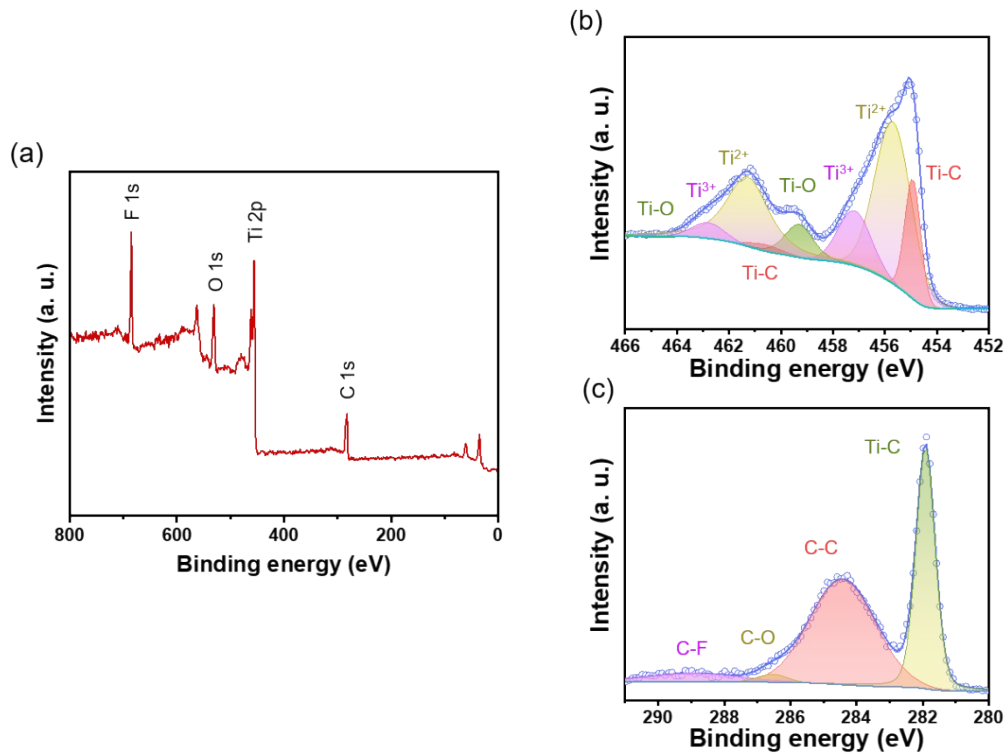

**Figure S2.** XPS analysis of the  $\text{Ti}_3\text{C}_2\text{T}_x$  NSs. (a) XPS survey spectrum. (b) High-resolution peak-fitting XPS spectrum of the Ti 2p region. (c) High-resolution peak-fitting XPS spectrum of the C 1s region.

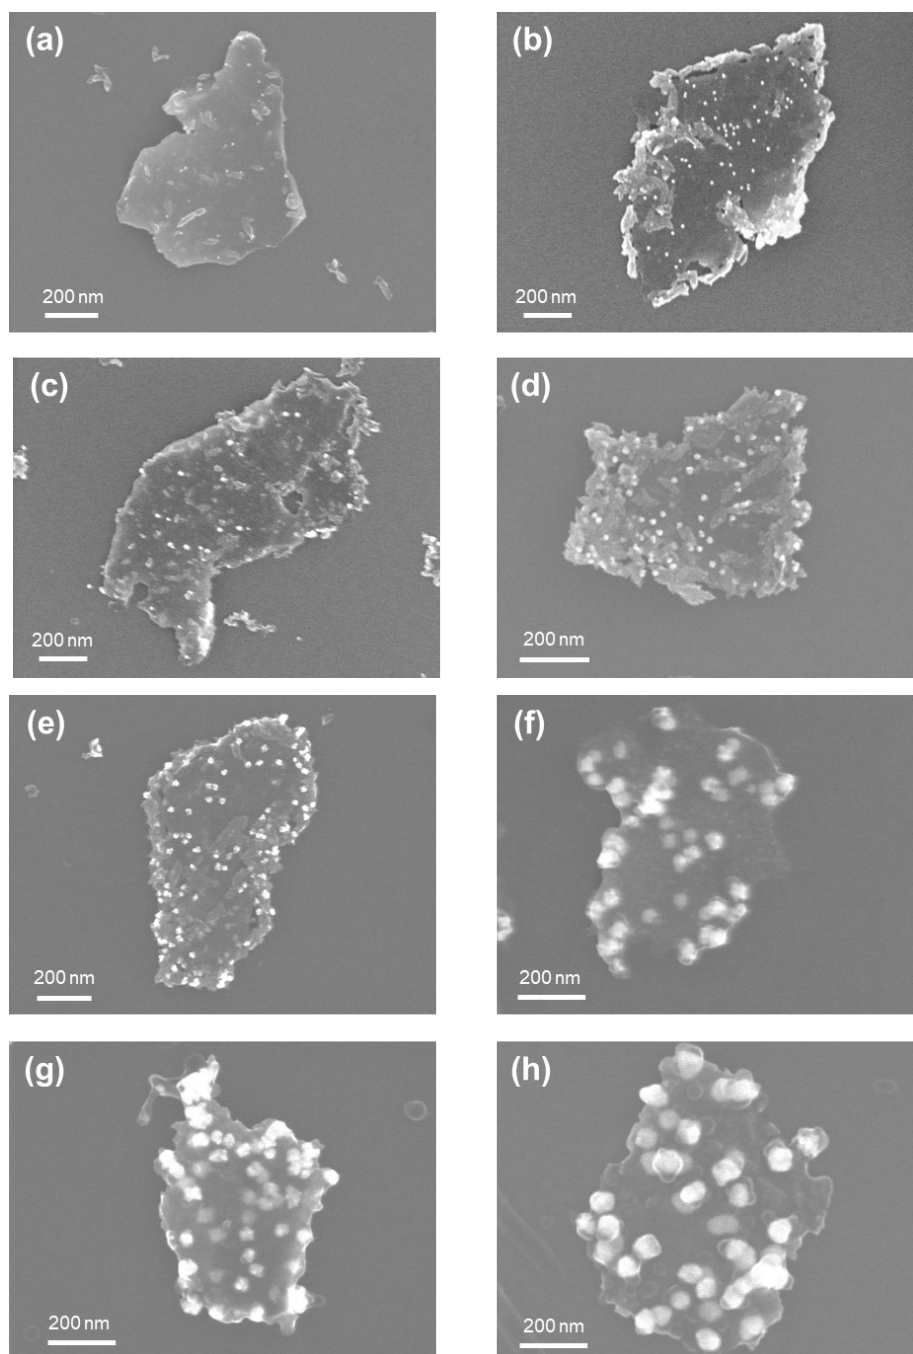

**Figure S3.** SEM images of the  $\text{Au}_y@\text{Ti}_3\text{C}_2\text{T}_x$  nanocomposites with different Au/Ti feeding ratios: (a) 0.0017, (b) 0.0042, (c) 0.0085, (d) 0.017, (e) 0.034, (f) 0.068, (g) 0.136, and (h) 0.2.

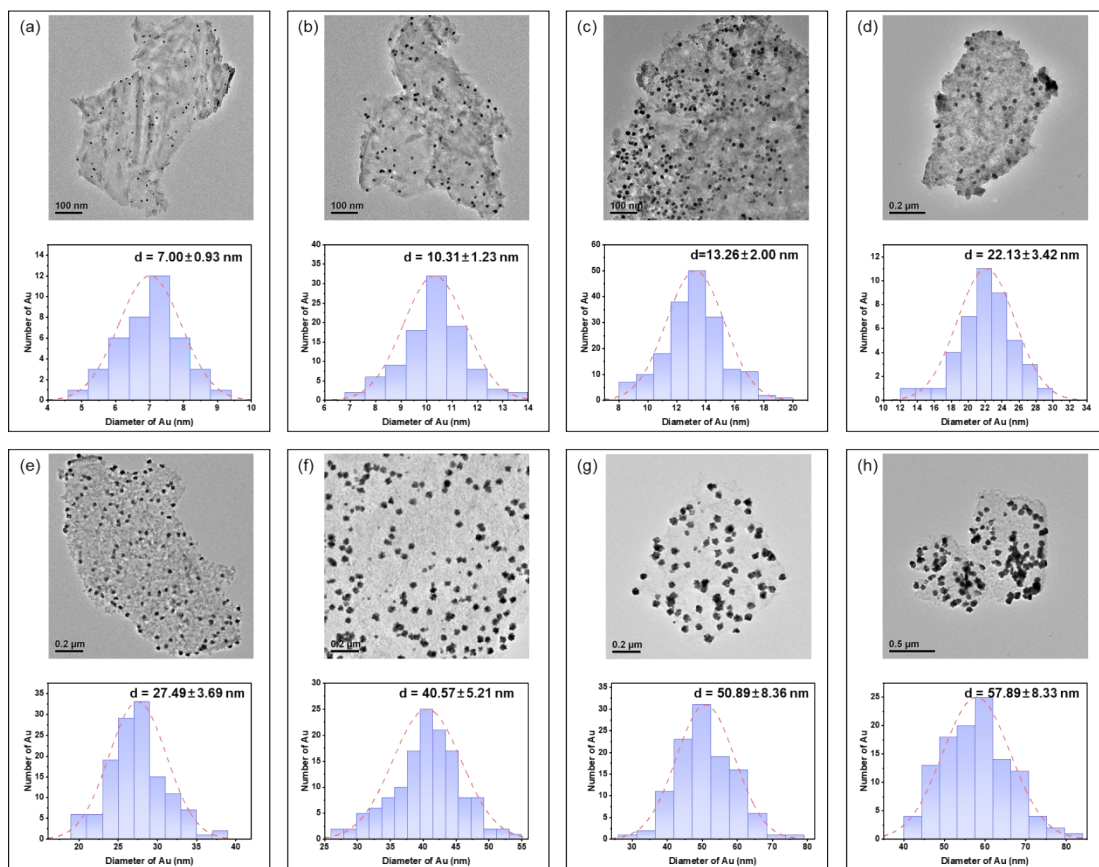

**Figure S4.** TEM images of the  $\text{Au}_y@\text{Ti}_3\text{C}_2\text{T}_x$  nanocomposites and size distribution histograms of the Au NPs obtained by different Au/Ti feeding ratios: (a) 0.0017, (b) 0.0042, (c) 0.0085, (d) 0.017, (e) 0.034, (f) 0.068, (g) 0.136, and (h) 0.2.

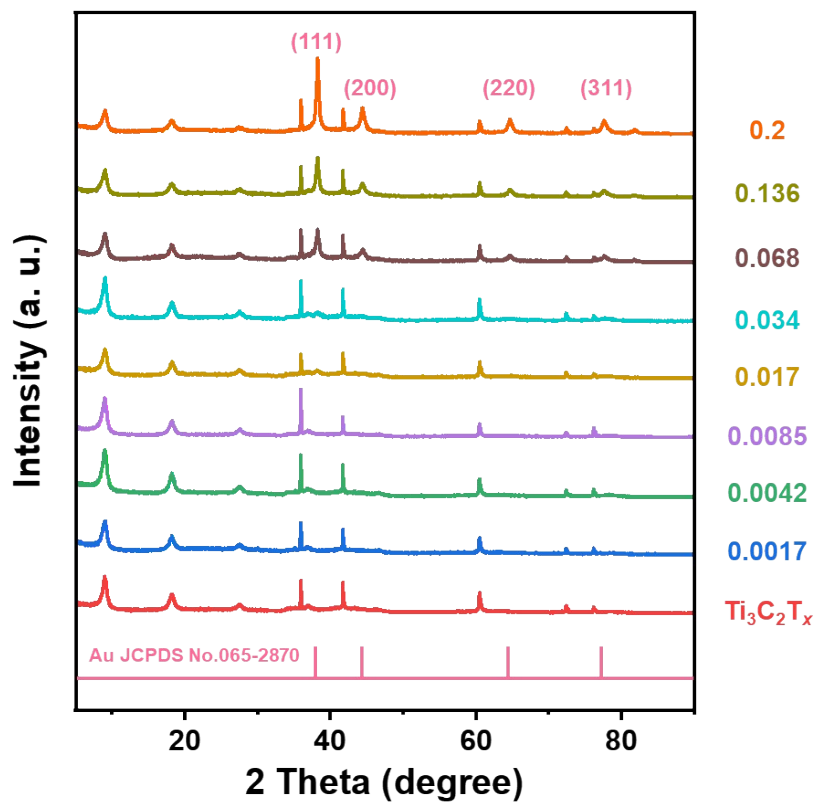

**Figure S5.** XRD patterns of the  $\text{Au}_y@\text{Ti}_3\text{C}_2\text{T}_x$  nanocomposites obtained by different Au/Ti feeding ratios.

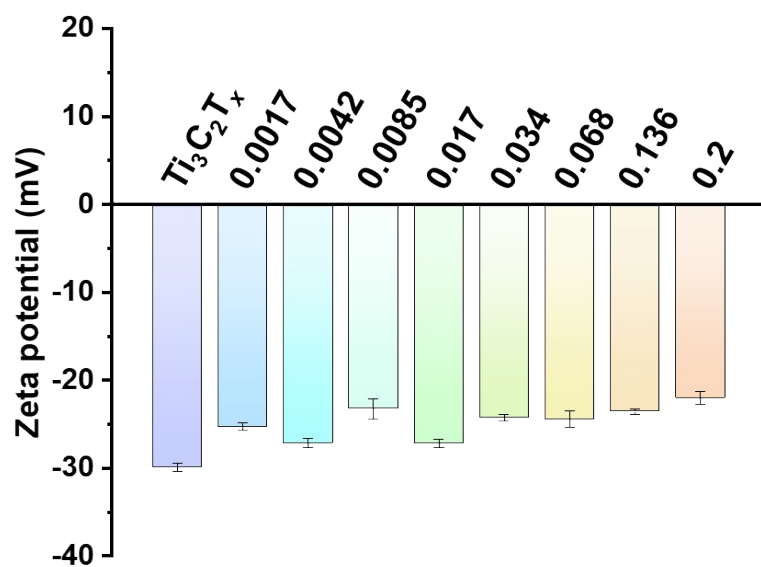

**Figure S6.** Zeta potential of the  $Au_y@Ti_3C_2T_x$  nanocomposites obtained by different Au/Ti feeding ratios.



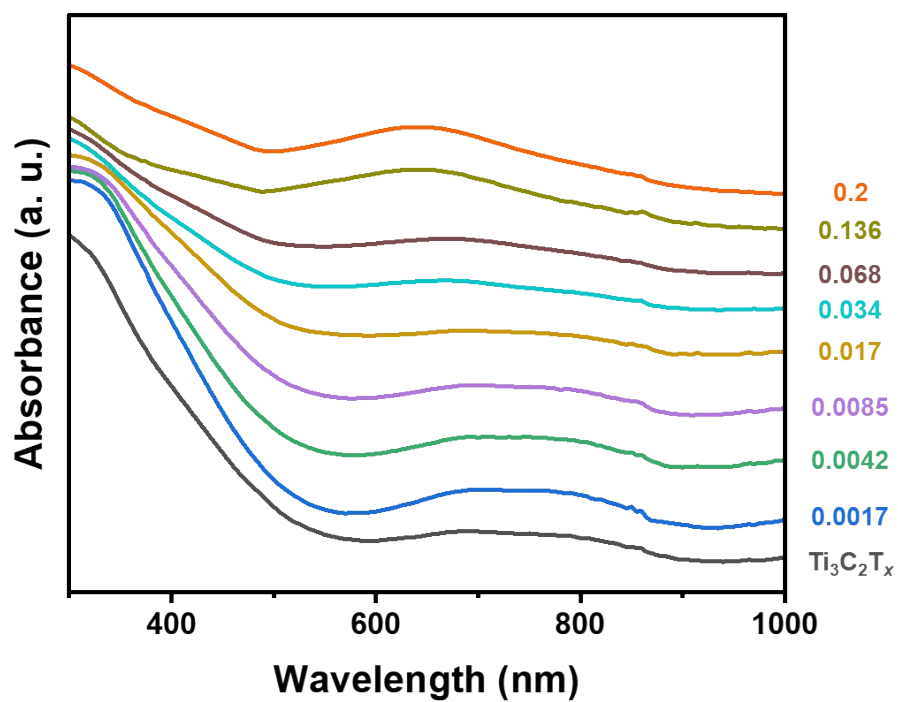

**Figure S7.** UV-Vis-NIR absorption spectra of the  $\text{Au}_y@\text{Ti}_3\text{C}_2\text{T}_x$  nanocomposites obtained by different Au/Ti feeding ratios.

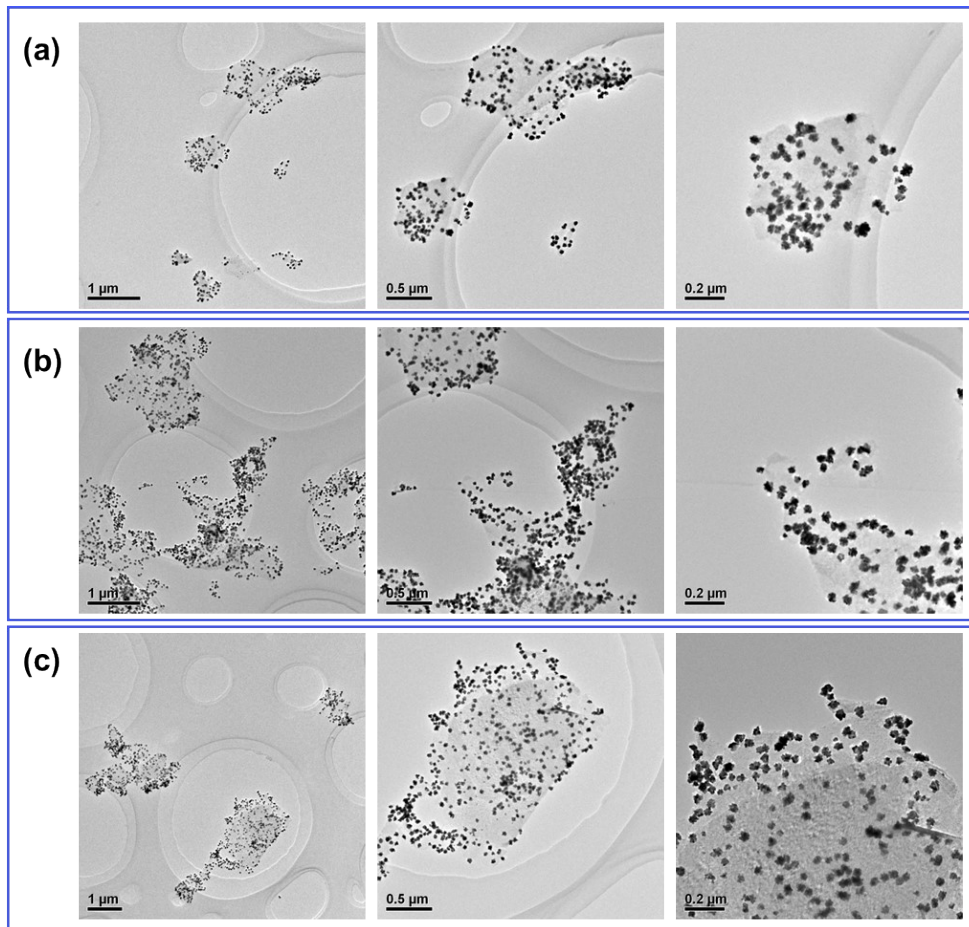

**Figure S8.** TEM images of the  $\text{Au}_{0.017}@\text{Ti}_3\text{C}_2\text{T}_x$  nanocomposites during three washing/centrifugation cycles: (a) first, (b) second, (c) third cycle.

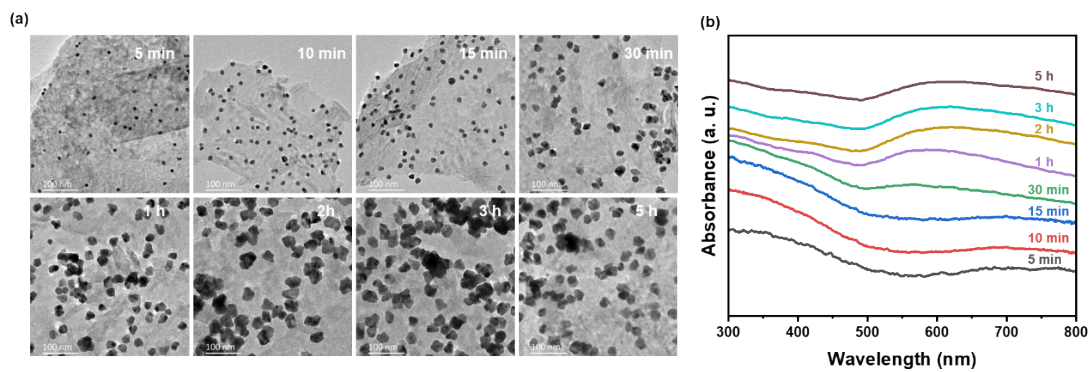

**Figure S9.** Characterization of the intermediates collected from different reaction time during the synthesis of  $\text{Au}_{0.027}@\text{Ti}_3\text{C}_2\text{T}_x$ . (a) TEM images. (b) Corresponding UV-Vis spectra.

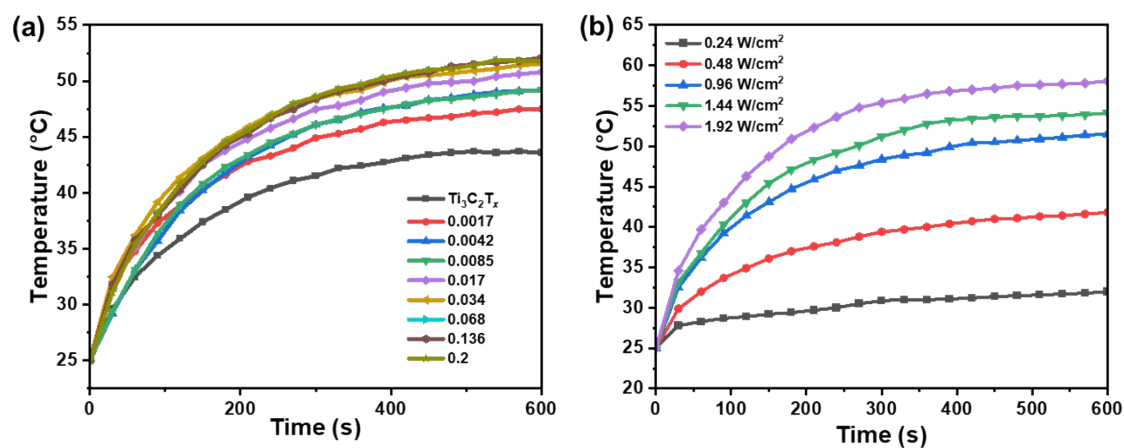

**Figure S10.** The photothermal activity test of the Au<sub>y</sub>@Ti<sub>3</sub>C<sub>2</sub>T<sub>x</sub> nanocomposites (100 μg/mL) obtained by different Au/Ti feeding ratios. (a) Effect of the Au composition on the variation in the temperature. (b) Effect of the power density on the variation in the temperature using the Au<sub>0.017</sub>@Ti<sub>3</sub>C<sub>2</sub>T<sub>x</sub> under a 660 nm laser.

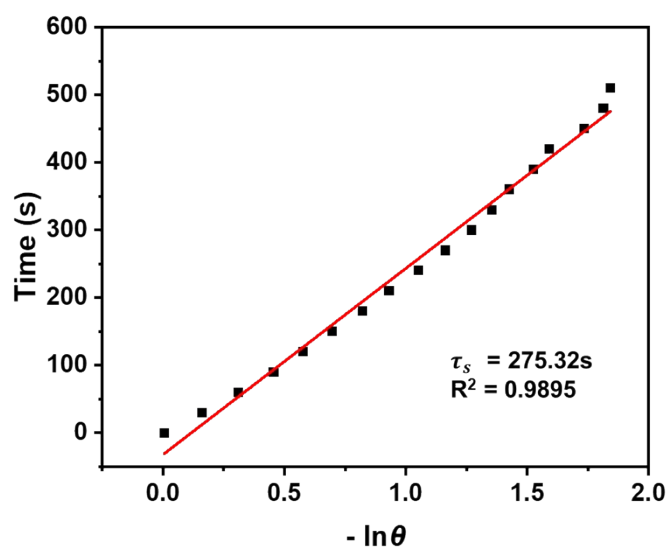

**Figure S11.** The fitting line of experimental data of time vs.  $-\ln\theta$  obtained from the cooling period for the  $Ti_3C_2T_x$  NSs.

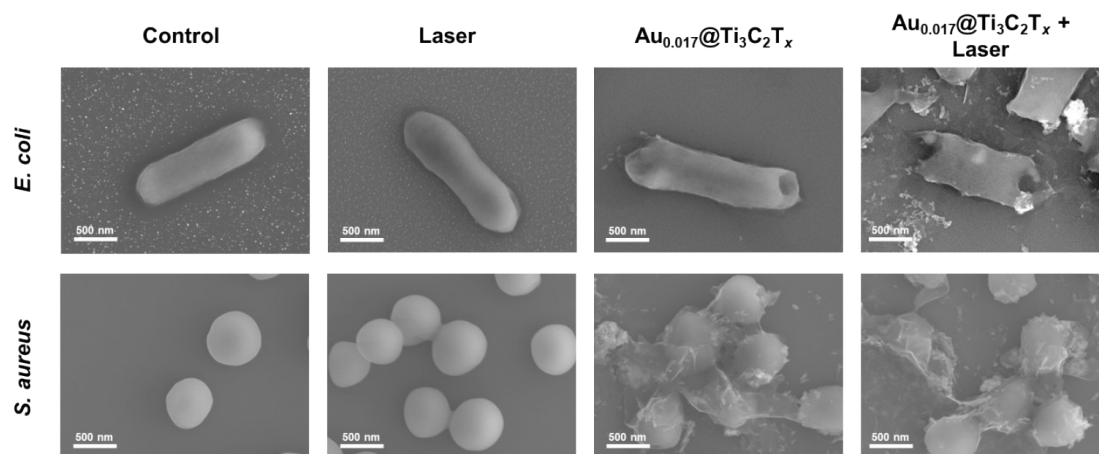

**Figure S12.** SEM images with higher magnification of *E. coli* (top panel) and *S. aureus* (bottom panel) treated with control, laser (660 nm, 0.96 W/cm<sup>2</sup>),  $\text{Au}_{0.017}@\text{Ti}_3\text{C}_2\text{T}_x$  (50 μg/mL), and laser +  $\text{Au}_{0.017}@\text{Ti}_3\text{C}_2\text{T}_x$ .

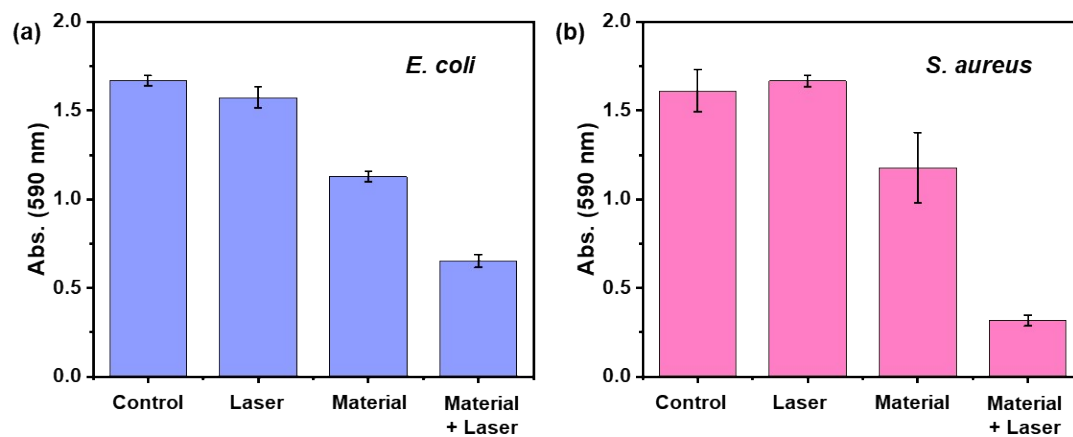

**Figure S13.** Biofilm elimination of (a) *E. coli* and (b) *S. aureus* under different treatments: control, laser (660 nm, 1.92 W/cm<sup>2</sup>, 20 min), Au<sub>0.017</sub>@Ti<sub>3</sub>C<sub>2</sub>T<sub>x</sub> (100 μg/mL), and laser + Au<sub>0.017</sub>@Ti<sub>3</sub>C<sub>2</sub>T<sub>x</sub>.

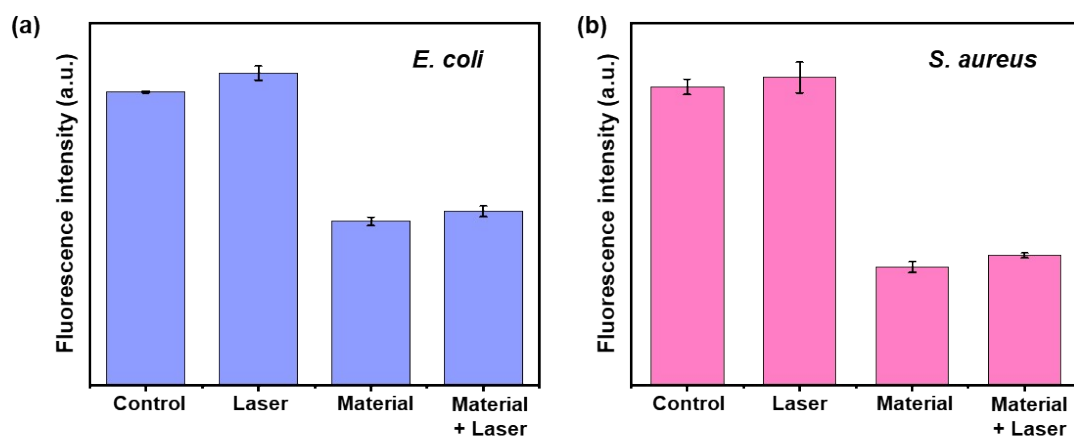

**Figure S14.** Intracellular ROS level in (a) *E. coli*, (b) *S. aureus* treated with control, laser (660 nm, 0.96 W/cm<sup>2</sup>), Au<sub>0.017</sub>@Ti<sub>3</sub>C<sub>2</sub>T<sub>x</sub> (50 µg/mL), and laser + Au<sub>0.017</sub>@Ti<sub>3</sub>C<sub>2</sub>T<sub>x</sub>.



**Table S1.** The composition of Au in the Au<sub>y</sub>@Ti<sub>3</sub>C<sub>2</sub>T<sub>x</sub> nanocomposites

| Entry | Feeding ratio of Au/Ti | Analyzed ratio of Au/Ti |
|-------|------------------------|-------------------------|
| 1     | 0.0017                 | 0.0007                  |
| 2     | 0.0042                 | 0.0014                  |
| 3     | 0.0085                 | 0.0024                  |
| 4     | 0.017                  | 0.0072                  |
| 5     | 0.034                  | 0.017                   |
| 6     | 0.068                  | 0.027                   |
| 7     | 0.136                  | 0.062                   |
| 8     | 0.2                    | 0.098                   |

## Appendix: Calculation of the photothermal conversion efficiency (PCE)<sup>1</sup>

The total energy balance of the system can be expressed as

$$\sum_i m_i C_{p,i} \frac{dT}{dt} = Q_{\text{Material}} + Q_{\text{Dis}} - Q_{\text{Surr}} \quad (1)$$

where  $m$  and  $C_p$  are the mass (0.2 g) and heat capacity (4.2 J/g) of water, respectively, and  $T$  represents the solution temperature,  $Q_{\text{Material}}$  stands for the energy generated by the material ( $\text{Ti}_3\text{C}_2\text{T}_x$  or  $\text{Au}_y@\text{Ti}_3\text{C}_2\text{T}_x$ ) during the irradiation of 660 nm laser,  $Q_{\text{Dis}}$  is the baseline energy generated by the container and pure water under the same irradiation condition, and  $Q_{\text{Surr}}$  is the dissipated energy as heat into the surroundings.

For the energy input term,  $Q_{\text{Material}}$  can be written as

$$Q_{\text{Material}} = I(1 - 10^{-A_{660}})\eta \quad (2)$$

in which  $I$  stands for the power of the incident beam with unit mW,  $A_{660}$  represents the absorbance of the  $\text{Ti}_3\text{C}_2\text{T}_x$  or  $\text{Au}_y@\text{Ti}_3\text{C}_2\text{T}_x$  at 660 nm, and  $\eta$  is the photothermal conversion efficiency from incident light to dissipated heat.

For the energy output term,  $Q_{\text{Surr}}$  can be calculated by the following equation:

$$Q_{\text{Surr}} = hS(T - T_{\text{Surr}}) \quad (3)$$

where  $h$  is the heat transfer coefficient,  $S$  is the surface area of the container, and  $T_{\text{Surr}}$  is the environment temperature.

Once the incident laser is settled, the total energy input will be finite, while the energy output increases as the solution temperature increases. However, a dynamic equilibrium will be achieved as the solution energy reaches a maximum ( $T_{\text{Max}}$ ) when the energy input terms ( $Q_{\text{Material}} + Q_{\text{Dis}}$ ) balance the energy output term ( $Q_{\text{Surr}}$ )<sub>Max</sub>.

$$Q_{\text{Material}} + Q_{\text{Dis}} = (Q_{\text{Surr}})_{\text{Max}} = hS(T_{\text{Max}} - T_{\text{Surr}}) \quad (4)$$

To get the equation (5) typically used to calculate the photothermal conversion efficiency ( $\eta$ ), equation (2) was substituted into (4):

$$\eta = \frac{hS(T_{\text{Max}} - T_{\text{Surr}}) - Q_{\text{Dis}}}{I(1 - 10^{-A_{660}})} \quad (5)$$

Since  $h$  and  $S$  are hard to be measured or calculated directly, a conventional method is adopted by utilizing data from the cooling period, in which a dimensionless

driving force ( $\theta$ ) is introduced.  $\theta$  can be expressed in terms of  $T_{\text{Max}}$ :

$$\theta = \frac{T - T_{\text{Surr}}}{T_{\text{Max}} - T_{\text{Surr}}} \quad (6)$$

The time constant ( $\tau_s$ ) of the sample system is defined as:

$$\tau_s = \frac{\sum_i m_i C_{p,i}}{hS} \quad (7)$$

Then, equation (6) and (7) are substituted into (1) to get the following equation:

$$\frac{d\theta}{dt} = \frac{1}{\tau_s} \left[ \frac{Q_{\text{Material}} + Q_{\text{Dis}}}{hS(T_{\text{Max}} - T_{\text{Surr}})} - \theta \right] \quad (8)$$

During the cooling period, when no light (external energy) is applied, there is no energy input ( $Q_{\text{Material}} + Q_{\text{Dis}} = 0$ ). Therefore, equation (8) can be further simplified to:

$$dt = -\tau_s \frac{d\theta}{\theta} \quad (9)$$

and integration gives:

$$t = -\tau_s \ln\theta \quad (10)$$

According to equation (10), by plotting  $t$  vs.  $-\ln\theta$ , the following  $\tau_s$  values are obtained: 275.32 s for the  $\text{Ti}_3\text{C}_2\text{T}_x$  NSs (Figure S11) and 233.91 s for the  $\text{Au}_{0.017}@\text{Ti}_3\text{C}_2\text{T}_x$  (Figure 4c), respectively, with corresponding  $A_{660}$  values of 0.848 and 1.298. Therefore, the photothermal conversion efficiency was calculated to be 33.52 % for the  $\text{Ti}_3\text{C}_2\text{T}_x$  and 47.93 % for  $\text{Au}_{0.017}@\text{Ti}_3\text{C}_2\text{T}_x$ .

## References

1. D. K. Roper, W. Ahn and M. Hoepfner, *J. Phys. Chem. C*, 2007, **111**, 3636-3641.
